# Supplementary material
Source: publisher figshare collection journal article supplement (https://acs.figshare.com/ndownloader/files/7796755)
Supplement: Supplementary file 1 [file 7796755]

#######################################################################
#
#                 Cambridge Crystallographic Data Centre
#                                CCDC 
#
#######################################################################
#
# If this CIF has been generated directly or indirectly from an entry in the 
# Cambridge Structural Database, then it will include bibliographic, chemical, 
# crystal, experimental, refinement or atomic coordinate data resulting from 
# the CCDC's data processing and validation procedures. Files generated from 
# CSD entries are Copyright 2016 Cambridge Crystallographic Data Centre. They 
# may be used in bona fide research applications only, and may not be copied or 
# further disseminated in any form, whether machine-readable or not, except for 
# the purposes of generating routine backup copies on your local computer 
# system.
# 
# Files arising from any other source may also contain material that is the 
# copyright of third parties, including the originator, and you should check 
# with the originator concerning the permitted uses of the information 
# contained in this CIF.
#
# For further information on the CCDC and the free tools enCIFer and Mercury
# for validating and visualising CIF files, please visit www.ccdc.cam.ac.uk
#
#######################################################################

data_0001
_symmetry_cell_setting           hexagonal
_symmetry_space_group_name_H-M   'P 63'
_symmetry_Int_Tables_number      173
loop_
_symmetry_equiv_pos_site_id
_symmetry_equiv_pos_as_xyz
1 x,y,z
2 -x,-y,1/2+z
3 -y,x-y,z
4 -x+y,-x,z
5 x-y,x,1/2+z
6 y,-x+y,1/2+z
_cell_length_a                   34.125
_cell_length_b                   34.125
_cell_length_c                   38.271
_cell_angle_alpha                90
_cell_angle_beta                 90
_cell_angle_gamma                120
_cell_volume                     38596.3
loop_
_atom_site_label
_atom_site_type_symbol
_atom_site_fract_x
_atom_site_fract_y
_atom_site_fract_z
OAF O 1.5393 0.707058 0.821731
CAJ C 1.51167 0.703843 0.799495
NAH N 1.51789 0.700933 0.765162
CAL C 1.55693 0.701306 0.749327
CAC C 1.5402 0.665506 0.720533
CAD C 1.58917 0.74861 0.734774
NAI N 1.4727 0.702388 0.807647
CAM C 1.45774 0.705941 0.842817
CAE C 1.42039 0.659889 0.856796
CAG C 1.44023 0.739135 0.838035
CAK C 1.47392 0.786643 0.851518
CAB C 1.47099 0.823457 0.830667
CAA C 1.46695 0.789992 0.890607
OAD O 1.44073 0.419376 0.929513
CAJ C 1.44049 0.445802 0.907539
OAE O 1.41265 0.43555 0.882899
CAF C 1.47761 0.49402 0.910674
CAG C 1.47191 0.520481 0.881436
CAK C 1.48757 0.568259 0.89322
CAA C 1.54012 0.598238 0.890633
NAH N 1.4681 0.586361 0.868868
CAI C 1.45143 0.612619 0.878379
OAC O 1.45002 0.622465 0.909132
NAB N 1.43653 0.627473 0.852223
NAB N 1.76627 0.889879 0.917468
CAE C 1.73155 0.843117 0.926116
CAF C 1.68569 0.839665 0.932439
CAG C 1.65007 0.790703 0.941349
CAH C 1.60301 0.786609 0.941663
CAK C 1.5661 0.737917 0.949868
CAA C 1.52061 0.736902 0.958307
NAI N 1.55921 0.709257 0.919192
CAJ C 1.55597 0.668315 0.921387
OAD O 1.55899 0.652377 0.949371
NAC N 1.54972 0.645678 0.89126
CAA C 1.31215 0.557059 1.04615
CAI C 1.36339 0.589677 1.04385
CAB C 1.38086 0.612484 1.07921
CAF C 1.3866 0.563014 1.03304
CAJ C 1.43742 0.593907 1.02713
CAC C 1.45909 0.56342 1.02115
NAG N 1.44663 0.622364 0.995724
CAH C 1.47749 0.667604 0.995384
OAE O 1.49786 0.688177 1.02209
NAD N 1.48454 0.688854 0.964291
CAG C 1.72527 0.699817 1.05911
CAE C 1.7653 0.732097 1.07495
CAL C 1.7887 0.775916 1.06165
OAD O 1.82793 0.807655 1.07719
CAF C 1.77194 0.787522 1.03257
CAH C 1.73201 0.75514 1.01665
CAM C 1.70846 0.711321 1.03011
CAI C 1.66513 0.676537 1.01315
CAN C 1.6242 0.67092 1.03403
CAA C 1.62754 0.718156 1.03763
NAJ N 1.58231 0.641583 1.01488
CAK C 1.5423 0.613668 1.03074
OAC O 1.5385 0.607306 1.06272
NAB N 1.50666 0.592384 1.00913
CAA C 1.49964 0.801226 1.14926
CAI C 1.527 0.779875 1.13604
CAB C 1.5728 0.802309 1.15414
CAF C 1.50014 0.729018 1.14351
CAJ C 1.52569 0.704046 1.13382
CAC C 1.4941 0.652885 1.14181
NAG N 1.53778 0.708073 1.09653
CAH C 1.57835 0.714198 1.08613
OAE O 1.60857 0.720762 1.10724
NAD N 1.58495 0.713622 1.05159
OAD O 1.52869 0.442453 1.18722
CAJ C 1.5366 0.467763 1.16164
OAE O 1.53074 0.455412 1.13055
CAF C 1.55093 0.516589 1.16935
CAG C 1.5931 0.54772 1.14732
CAK C 1.60395 0.597189 1.1502
CAA C 1.64896 0.629064 1.1299
NAH N 1.56762 0.602299 1.13447
CAI C 1.54777 0.623379 1.15007
OAC O 1.55718 0.637794 1.18038
NAB N 1.51651 0.626966 1.13105
NAB N 1.85429 0.945237 1.10928
CAE C 1.82406 0.896207 1.11336
CAF C 1.79335 0.886665 1.14489
CAG C 1.76515 0.835605 1.15156
CAH C 1.72106 0.82542 1.16995
CAK C 1.69577 0.777134 1.18388
CAA C 1.65407 0.771213 1.20598
NAI N 1.677 0.743636 1.15582
CAJ C 1.67863 0.704926 1.15605
OAD O 1.70003 0.696805 1.17808
NAC N 1.65591 0.675725 1.13055
CAA C 1.49368 0.570932 1.31857
CAI C 1.53609 0.61157 1.30376
CAB C 1.55931 0.64693 1.33284
CAF C 1.56776 0.595497 1.28934
CAJ C 1.61283 0.634884 1.27705
CAC C 1.64254 0.615055 1.26323
NAG N 1.60604 0.659686 1.24855
CAH C 1.63254 0.704656 1.24447
OAE O 1.66294 0.728003 1.26543
NAD N 1.62431 0.722894 1.21597
CAA C 1.83553 0.749016 1.23661
CAG C 1.79712 0.750099 1.25579
CAB C 1.79862 0.796049 1.24938
NAE N 1.75368 0.714028 1.2423
CAF C 1.7216 0.681037 1.26234
OAD O 1.72652 0.677823 1.29412
NAC N 1.68369 0.651464 1.24554
CAA C 1.60958 0.781973 1.37206
CAM C 1.65655 0.799027 1.35628
CAB C 1.68629 0.849884 1.36357
CAH C 1.67726 0.772465 1.37277
CAN C 1.72587 0.790263 1.36012
NAJ N 1.72545 0.78468 1.32223
CAL C 1.76366 0.797741 1.30486
OAF O 1.80057 0.816013 1.32006
NAD N 1.76014 0.791008 1.27031
CAG C 1.74505 0.76316 1.37763
NAI N 1.72275 0.717277 1.36192
CAK C 1.68949 0.681003 1.37778
OAE O 1.67601 0.683575 1.40694
NAC N 1.67153 0.642091 1.3609
OAF O 1.57275 0.833439 1.58668
CAJ C 1.55198 0.817806 1.61352
NAH N 1.57231 0.831274 1.6443
CAL C 1.62001 0.865483 1.64777
CAC C 1.63241 0.872589 1.68652
CAD C 1.64977 0.851576 1.62752
NAI N 1.50827 0.786609 1.61328
CAM C 1.48224 0.768235 1.5808
CAE C 1.43745 0.769859 1.58091
CAG C 1.47265 0.719172 1.57767
CAK C 1.51297 0.712844 1.58718
CAB C 1.49775 0.662528 1.58948
CAA C 1.55239 0.737342 1.56126
OAD O 1.41949 0.988413 1.5436
CAJ C 1.42269 0.967501 1.51809
OAE O 1.39151 0.941176 1.4998
CAF C 1.46863 0.9741 1.51018
CAG C 1.48672 0.963982 1.54396
CAK C 1.49805 0.926153 1.53764
CAA C 1.54972 0.94527 1.54132
NAH N 1.4763 0.890387 1.56421
CAI C 1.46554 0.847245 1.55781
OAC O 1.47143 0.835469 1.52878
NAB N 1.44822 0.817705 1.58436
NAB N 1.76381 0.874517 1.50817
CAE C 1.7297 0.885548 1.49552
CAF C 1.68218 0.845011 1.49996
CAG C 1.64718 0.858343 1.48969
CAH C 1.60153 0.815167 1.4829
CAK C 1.56354 0.82657 1.47906
CAA C 1.51698 0.782108 1.47336
NAI N 1.56149 0.849546 1.51096
CAJ C 1.55912 0.887714 1.50992
OAD O 1.55845 0.90541 1.48214
NAC N 1.55711 0.90585 1.54054
CAA C 1.31076 0.757475 1.38348
CAI C 1.36125 0.774698 1.38904
CAB C 1.38042 0.764919 1.35612
CAF C 1.38524 0.825657 1.39654
CAJ C 1.43575 0.845451 1.40454
CAC C 1.45623 0.896782 1.41371
NAG N 1.44389 0.823999 1.43516
CAH C 1.47541 0.810193 1.43566
OAE O 1.49715 0.811242 1.40924
NAD N 1.48124 0.794493 1.46688
CAG C 1.7221 1.02641 1.3725
CAE C 1.76233 1.03338 1.35751
CAL C 1.78525 1.01311 1.37182
OAD O 1.82463 1.02019 1.3573
CAF C 1.76821 0.98601 1.40135
CAH C 1.72822 0.979107 1.41643
CAM C 1.70478 0.998801 1.40174
CAI C 1.66142 0.990849 1.41805
CAN C 1.62048 0.953933 1.39848
CAA C 1.62443 0.91008 1.39573
NAJ N 1.57929 0.941176 1.41815
CAK C 1.53936 0.930179 1.40287
OAC O 1.53537 0.934578 1.37107
NAB N 1.50409 0.915088 1.42495
CAA C 1.50118 0.702794 1.27533
CAI C 1.52613 0.748948 1.29346
CAB C 1.57368 0.776458 1.27789
CAF C 1.49823 0.772668 1.28892
CAJ C 1.52353 0.822916 1.2994
CAC C 1.49147 0.842135 1.29187
NAG N 1.53525 0.829649 1.33658
CAH C 1.57526 0.864603 1.34724
OAE O 1.60452 0.889372 1.3262
NAD N 1.58194 0.8711 1.38165
OAD O 1.51667 1.08201 1.2481
CAJ C 1.53442 1.07321 1.27303
OAE O 1.54344 1.09236 1.30209
CAF C 1.54372 1.03467 1.2682
CAG C 1.58722 1.04617 1.28782
CAK C 1.59866 1.00817 1.28369
CAA C 1.64478 1.02252 1.30305
NAH N 1.56312 0.965979 1.29945
CAI C 1.54319 0.925002 1.28372
OAC O 1.55096 0.919622 1.25296
NAB N 1.51377 0.890082 1.3035
NAB N 1.86574 0.924833 1.29929
CAE C 1.83931 0.948045 1.29757
CAF C 1.78946 0.914039 1.2914
CAG C 1.76437 0.938063 1.27841
CAH C 1.7215 0.903482 1.25944
CAK C 1.69386 0.924461 1.24675
CAA C 1.65173 0.887612 1.22561
NAI N 1.67498 0.937928 1.27575
CAJ C 1.67573 0.977923 1.27604
OAD O 1.6969 1.00814 1.25422
NAC N 1.65249 0.983439 1.30162
CAA C 1.48878 0.923446 1.11456
CAI C 1.53291 0.927066 1.12723
CAB C 1.55549 0.916204 1.09697
CAF C 1.56357 0.975149 1.14098
CAJ C 1.60869 0.982051 1.15498
CAC C 1.63689 1.03159 1.16925
NAG N 1.60231 0.950887 1.18364
CAH C 1.62885 0.932345 1.18717
OAE O 1.65779 0.9383 1.1652
NAD N 1.62175 0.906426 1.21576
CAA C 1.83181 1.08759 1.19164
CAG C 1.79119 1.05013 1.1729
CAB C 1.7905 1.00421 1.17669
NAE N 1.7492 1.04475 1.18816
CAF C 1.7156 1.04401 1.1688
OAD O 1.71841 1.04905 1.13659
NAC N 1.67874 1.03751 1.1866
CAA C 1.59754 0.831916 1.05436
CAM C 1.64635 0.860847 1.06648
CAB C 1.67449 0.840883 1.05193
CAH C 1.66453 0.908929 1.05297
CAN C 1.71293 0.94033 1.06551
NAJ N 1.71372 0.945067 1.10395
CAL C 1.75295 0.969261 1.12106
OAF O 1.78949 0.987533 1.10531
NAD N 1.75062 0.972272 1.15587
CAG C 1.72941 0.98601 1.04824
NAI N 1.70969 1.0101 1.06706
CAK C 1.67831 1.01843 1.05344
OAE O 1.66263 1.00553 1.0241
NAC N 1.66444 1.04103 1.07335
O O 1.85295 0.78627 1.13724
O O 1.85159 1.06942 1.29848
O O 1.89434 1.04614 1.24575
O O 1.95582 1.09449 1.18375
O O 1.89636 0.992811 1.17742
O O 1.77785 1.08025 1.27269
O O 1.79628 0.911806 1.01399
O O 1.75635 0.904023 0.845038
O O 1.77694 0.857057 1.58425
O O 1.76001 0.811783 1.46173
O O 1.81268 0.884533 1.41172
O O 1.93944 0.986958 1.34499
O O 1.79172 1.1133 1.09047
O O 1.78713 0.658603 1.32957
O O 1.64229 0.78018 0.830536
O O 1.92323 0.967907 1.06635
O O 1.88366 1.03937 1.45855
O O 1.86719 0.909978 1.22116
O O 1.34425 0.846839 1.49698
O O 1.28039 0.871032 1.46531
O O 1.33891 0.945101 1.44616
O O 1.6898 0.731793 1.4696
OAA O 1.50136 0.947199 1.21027
CAC C 1.45435 0.914952 1.21416
CAE C 1.446 0.867885 1.20434
CAG C 1.4033 0.831307 1.22231
CAH C 1.3968 0.785898 1.21199
CAF C 1.34842 0.750099 1.21881
CAD C 1.34759 0.725465 1.25247
CAA C 1.54067 0.890962 0.985455
OAE O 1.5872 0.924055 0.993111
CAC C 1.61015 0.942766 0.962409
CAD C 1.6121 0.905647 0.943518
OAF O 1.56713 0.874889 0.932048
CAB C 1.53863 0.856042 0.961312

#END
#HEADER    ----                                    16-OCT-14   xxxx              
#COMPND    ---                                                                   
#REMARK   3
#REMARK   3 REFINEMENT.
#REMARK   3   PROGRAM     : REFMAC 5.8.0073  
#REMARK   3   AUTHORS     : MURSHUDOV,SKUBAK,LEBEDEV,PANNU,
#REMARK   3                 STEINER,NICHOLLS,WINN,LONG,VAGIN
#REMARK   3
#REMARK   3    REFINEMENT TARGET : MAXIMUM LIKELIHOOD
#REMARK   3
#REMARK   3  DATA USED IN REFINEMENT.
#REMARK   3   RESOLUTION RANGE HIGH (ANGSTROMS) :   1.15
#REMARK   3   RESOLUTION RANGE LOW  (ANGSTROMS) :  29.55
#REMARK   3   DATA CUTOFF            (SIGMA(F)) : NONE
#REMARK   3   COMPLETENESS FOR RANGE        (%) :  99.97
#REMARK   3   NUMBER OF REFLECTIONS             :    8653
#REMARK   3
#REMARK   3  FIT TO DATA USED IN REFINEMENT.
#REMARK   3   CROSS-VALIDATION METHOD          : THROUGHOUT
#REMARK   3   FREE R VALUE TEST SET SELECTION  : RANDOM
#REMARK   3   R VALUE     (WORKING + TEST SET) : 0.18722
#REMARK   3   R VALUE            (WORKING SET) :  0.18574
#REMARK   3   FREE R VALUE                     :  0.21308
#REMARK   3   FREE R VALUE TEST SET SIZE   (%) :  4.8
#REMARK   3   FREE R VALUE TEST SET COUNT      :   440
#REMARK   3
#REMARK   3  FIT IN THE HIGHEST RESOLUTION BIN.
#REMARK   3   TOTAL NUMBER OF BINS USED           :      20
#REMARK   3   BIN RESOLUTION RANGE HIGH           :    1.149
#REMARK   3   BIN RESOLUTION RANGE LOW            :    1.179
#REMARK   3   REFLECTION IN BIN     (WORKING SET) :      630
#REMARK   3   BIN COMPLETENESS (WORKING+TEST) (%) :    99.70
#REMARK   3   BIN R VALUE           (WORKING SET) :    0.230
#REMARK   3   BIN FREE R VALUE SET COUNT          :       32
#REMARK   3   BIN FREE R VALUE                    :    0.237
#REMARK   3
#REMARK   3  NUMBER OF NON-HYDROGEN ATOMS USED IN REFINEMENT.
#REMARK   3   ALL ATOMS                :      279
#REMARK   3
#REMARK   3  B VALUES.
#REMARK   3   FROM WILSON PLOT           (A**2) : NULL
#REMARK   3   MEAN B VALUE      (OVERALL, A**2) :  19.266
#REMARK   3   OVERALL ANISOTROPIC B VALUE.
#REMARK   3    B11 (A**2) :    -0.49
#REMARK   3    B22 (A**2) :    -0.49
#REMARK   3    B33 (A**2) :     0.98
#REMARK   3    B12 (A**2) :    -0.00
#REMARK   3    B13 (A**2) :    -0.00
#REMARK   3    B23 (A**2) :    -0.00
#REMARK   3
#REMARK   3  ESTIMATED OVERALL COORDINATE ERROR.
#REMARK   3   ESU BASED ON R VALUE                            (A):   0.010
#REMARK   3   ESU BASED ON FREE R VALUE                       (A):   0.009
#REMARK   3   ESU BASED ON MAXIMUM LIKELIHOOD                 (A):   0.031
#REMARK   3   ESU FOR B VALUES BASED ON MAXIMUM LIKELIHOOD (A**2):   1.340
#REMARK   3
#REMARK   3 CORRELATION COEFFICIENTS.
#REMARK   3   CORRELATION COEFFICIENT FO-FC      :   0.973
#REMARK   3   CORRELATION COEFFICIENT FO-FC FREE :   0.977
#REMARK   3
#REMARK   3  RMS DEVIATIONS FROM IDEAL VALUES        COUNT    RMS    WEIGHT
#REMARK   3   BOND LENGTHS REFINED ATOMS        (A):   256 ; 0.017 ; 0.022
#REMARK   3   BOND LENGTHS OTHERS               (A):   353 ; 0.014 ; 0.026
#REMARK   3   BOND ANGLES REFINED ATOMS   (DEGREES):   319 ; 2.015 ; 2.740
#REMARK   3   BOND ANGLES OTHERS          (DEGREES):   764 ; 5.745 ; 3.386
#REMARK   3   CHIRAL-CENTER RESTRAINTS       (A**3):    34 ; 0.073 ; 0.200
#REMARK   3   GENERAL PLANES REFINED ATOMS      (A):   274 ; 0.041 ; 0.029
#REMARK   3   GENERAL PLANES OTHERS             (A):    74 ; 0.021 ; 0.029
#REMARK   3
#REMARK   3  ISOTROPIC THERMAL FACTOR RESTRAINTS.     COUNT   RMS    WEIGHT
#REMARK   3   SIDE-CHAIN BOND REFINED ATOMS  (A**2):   256 ; 2.298 ; 1.868
#REMARK   3   SIDE-CHAIN BOND OTHER ATOMS  (A**2)  :   257 ; 2.293 ; 1.872
#REMARK   3   SIDE-CHAIN ANGLE OTHER ATOMS (A**2)  :   320 ; 2.857 ; 2.816
#REMARK   3   LONG RANGE B REFINED ATOMS (A**2)    :   241 ; 3.396 ;******
#REMARK   3   LONG RANGE B OTHER ATOMS (A**2)      :   242 ; 3.390 ;******
#REMARK   3
#REMARK   3 ANISOTROPIC THERMAL FACTOR RESTRAINTS.    COUNT   RMS   WEIGHT
#REMARK   3   RIGID-BOND RESTRAINTS          (A**2):   250 ; 5.691 ; 3.000
#REMARK   3   SPHERICITY; BONDED ATOMS       (A**2):   251 ;13.844 ; 5.000
#REMARK   3
#REMARK   3  NCS RESTRAINTS STATISTICS
#REMARK   3   NUMBER OF NCS GROUPS : NULL
#REMARK   3
#REMARK   3  TWIN DETAILS
#REMARK   3   NUMBER OF TWIN DOMAINS  :    2
#REMARK   3      TWIN DOMAIN   :    1
#REMARK   3      TWIN OPERATOR :  H,  K,  L
#REMARK   3      TWIN FRACTION : 0.540
#REMARK   3      TWIN DOMAIN   :    2
#REMARK   3      TWIN OPERATOR :  K,  H, -L
#REMARK   3      TWIN FRACTION : 0.460
#REMARK   3
#REMARK   3
#REMARK   3  TLS DETAILS
#REMARK   3   NUMBER OF TLS GROUPS  : NULL
#REMARK   3
#REMARK   3
#REMARK   3  BULK SOLVENT MODELLING.
#REMARK   3   METHOD USED :  MASK
#REMARK   3   PARAMETERS FOR MASK CALCULATION
#REMARK   3   VDW PROBE RADIUS   :   1.20
#REMARK   3   ION PROBE RADIUS   :   0.80
#REMARK   3   SHRINKAGE RADIUS   :   0.80
#REMARK   3
#REMARK   3  OTHER REFINEMENT #REMARKS:
#REMARK   3  HYDROGENS HAVE BEEN ADDED IN THE RIDING POSITIONS
#REMARK   3  U VALUES      : REFINED INDIVIDUALLY
#REMARK   3
#LINKR        CAE ULN A   1                 NAB URG A   2                ULN-URG
#LINKR        CAA URG A   2                 NAC URK A   3                URG-URK
#LINKR        CAA URK A   3                 NAD URL A   4                URK-URL
#LINKR        CAC URL A   4                 NAB URY A   5                URL-URY
#LINKR        CAA URY A   5                 NAD URL A   6                URY-URL
#LINKR        CAC URL A   6                 NAB URG A   7                URL-URG
#LINKR        CAA URG A   7                 NAC URK A   8                URG-URK
#LINKR        CAA URK A   8                 NAD URL A   9                URK-URL
#LINKR        CAC URL A   9                 NAC URA A  10                URL-URA
#LINKR        CAB URA A  10                 NAD ULC A  11                URA-ULC
#LINKR        CAE ULN B   1                 NAB URG B   2                ULN-URG
#LINKR        CAA URG B   2                 NAC URK B   3                URG-URK
#LINKR        CAA URK B   3                 NAD URL B   4                URK-URL
#LINKR        CAC URL B   4                 NAB URY B   5                URL-URY
#LINKR        CAA URY B   5                 NAD URL B   6                URY-URL
#LINKR        CAC URL B   6                 NAB URG B   7                URL-URG
#LINKR        CAA URG B   7                 NAC URK B   8                URG-URK
#LINKR        CAA URK B   8                 NAD URL B   9                URK-URL
#LINKR        CAC URL B   9                 NAC URA B  10                URL-URA
#LINKR        CAB URA B  10                 NAD ULC B  11                URA-ULC
#CRYST1   34.125   34.125   38.271  90.00  90.00 120.00 P 63                     
#SCALE1      0.029304  0.016919  0.000000        0.00000                         
#SCALE2     -0.000000  0.033837  0.000000        0.00000                         
#SCALE3      0.000000 -0.000000  0.026129        0.00000                         
#HETATM    1  OAF ULN A   1      40.464  20.896  31.449  1.00 37.90           O
#ANISOU    1  OAF ULN A   1     6300   4270   3830   1440    745   1067       O
#HETATM    2  CAJ ULN A   1      39.576  20.801  30.598  1.00 42.29           C
#ANISOU    2  CAJ ULN A   1     4935   6087   5046   1520    825    838       C
#HETATM    3  NAH ULN A   1      39.838  20.715  29.284  1.00 41.94           N
#ANISOU    3  NAH ULN A   1     4907   5752   5273   1705   1300    355       N
#HETATM    4  CAL ULN A   1      41.164  20.726  28.678  1.00 38.81           C
#ANISOU    4  CAL ULN A   1     4722   4010   6014   1991   1311    509       C
#HETATM    5  CAC ULN A   1      41.204  19.668  27.576  1.00 39.28           C
#ANISOU    5  CAC ULN A   1     4687   4775   5460   2545   2364    441       C
#HETATM    6  CAD ULN A   1      41.457  22.124  28.121  1.00 39.39           C
#ANISOU    6  CAD ULN A   1     4830   4418   5719   2561    564   1400       C
#HETATM    7  NAI ULN A   1      38.271  20.758  30.910  1.00 42.48           N
#ANISOU    7  NAI ULN A   1     4875   5994   5272   1371    956    936       N
#HETATM    8  CAM ULN A   1      37.700  20.863  32.256  1.00 36.16           C
#ANISOU    8  CAM ULN A   1     3710   5002   5026   1653    422   1284       C
#HETATM    9  CAE ULN A   1      37.211  19.502  32.791  1.00 35.23           C
#ANISOU    9  CAE ULN A   1     3384   5554   4445    343    559    630       C
#HETATM   10  CAG ULN A   1      36.536  21.844  32.073  1.00 33.32           C
#ANISOU   10  CAG ULN A   1     4226   3967   4464   1582    733   1285       C
#HETATM   11  CAK ULN A   1      36.875  23.248  32.589  1.00 24.90           C
#ANISOU   11  CAK ULN A   1     2931   3452   3078   1554    669   2070       C
#HETATM   12  CAB ULN A   1      36.147  24.336  31.791  1.00 29.56           C
#ANISOU   12  CAB ULN A   1     4497   4366   2366   2402    543    822       C
#HETATM   13  CAA ULN A   1      36.580  23.347  34.085  1.00 29.91           C
#ANISOU   13  CAA ULN A   1     4150   4038   3176    579    910   1799       C
#HETATM   14  OAD URG A   2      42.009  12.394  35.574  1.00 26.75           O
#ANISOU   14  OAD URG A   2     4386   3863   1915   -203    293    330       O
#HETATM   15  CAJ URG A   2      41.550  13.175  34.733  1.00 22.84           C
#ANISOU   15  CAJ URG A   2     3428   3233   2015   -262     92   -159       C
#HETATM   16  OAE URG A   2      40.775  12.872  33.790  1.00 24.40           O
#ANISOU   16  OAE URG A   2     3455   3848   1964   -197     63   -128       O
#HETATM   17  CAF URG A   2      41.994  14.600  34.853  1.00 24.98           C
#ANISOU   17  CAF URG A   2     3790   3379   2320   -527    431     83       C
#HETATM   18  CAG URG A   2      41.348  15.382  33.734  1.00 26.16           C
#ANISOU   18  CAG URG A   2     4064   3145   2728   -365    -66   -246       C
#HETATM   19  CAK URG A   2      41.067  16.794  34.185  1.00 21.61           C
#ANISOU   19  CAK URG A   2     3152   3189   1869   -574    406   -336       C
#HETATM   20  CAA URG A   2      42.349  17.680  34.086  1.00 18.91           C
#ANISOU   20  CAA URG A   2     3067   2888   1228   -482    468   -299       C
#HETATM   21  NAH URG A   2      40.094  17.329  33.253  1.00 24.64           N
#ANISOU   21  NAH URG A   2     2599   3858   2903   -660   -302   -848       N
#HETATM   22  CAI URG A   2      39.077  18.105  33.617  1.00 25.36           C
#ANISOU   22  CAI URG A   2     2076   4518   3038   -806   -346   -956       C
#HETATM   23  OAC URG A   2      38.861  18.396  34.794  1.00 30.10           O
#ANISOU   23  OAC URG A   2     2670   5538   3227   -772    161  -1084       O
#HETATM   24  NAB URG A   2      38.315  18.544  32.616  1.00 31.32           N
#ANISOU   24  NAB URG A   2     2874   5454   3571    -63   -546   -581       N
#HETATM   25  NAB URK A   3      45.090  26.299  35.113  1.00 26.72           N
#ANISOU   25  NAB URK A   3     4304   3047   2800   -226    823   -357       N
#HETATM   26  CAE URK A   3      44.703  24.917  35.444  1.00 20.81           C
#ANISOU   26  CAE URK A   3     3172   2694   2039    168    691   -776       C
#HETATM   27  CAF URK A   3      43.197  24.815  35.686  1.00 20.61           C
#ANISOU   27  CAF URK A   3     3019   2720   2090   -354    299    308       C
#HETATM   28  CAG URK A   3      42.817  23.368  36.027  1.00 19.64           C
#ANISOU   28  CAG URK A   3     2831   2612   2018   -314    197    195       C
#HETATM   29  CAH URK A   3      41.281  23.247  36.039  1.00 18.44           C
#ANISOU   29  CAH URK A   3     2734   2556   1717    112    169    434       C
#HETATM   30  CAK URK A   3      40.852  21.808  36.353  1.00 17.21           C
#ANISOU   30  CAK URK A   3     2505   2501   1530    -29    -87    212       C
#HETATM   31  CAA URK A   3      39.317  21.778  36.676  1.00 15.80           C
#ANISOU   31  CAA URK A   3     2425   2168   1410    468    -97    -31       C
#HETATM   32  NAI URK A   3      41.106  20.961  35.179  1.00 16.24           N
#ANISOU   32  NAI URK A   3     2480   2334   1356   -190   -150    308       N
#HETATM   33  CAJ URK A   3      41.694  19.751  35.263  1.00 14.35           C
#ANISOU   33  CAJ URK A   3     2140   2130   1181   -492   -103     92       C
#HETATM   34  OAD URK A   3      42.069  19.280  36.334  1.00 15.05           O
#ANISOU   34  OAD URK A   3     2150   2481   1086   -246    -60     40       O
#HETATM   35  NAC URK A   3      41.867  19.082  34.110  1.00 18.30           N
#ANISOU   35  NAC URK A   3     2844   2902   1205   -462     98    -82       N
#HETATM   36  CAA URL A   4      35.272  16.463  40.038  1.00 17.39           C
#ANISOU   36  CAA URL A   4     1799   2488   2320   -135     49     16       C
#HETATM   37  CAI URL A   4      36.464  17.427  39.950  1.00 14.84           C
#ANISOU   37  CAI URL A   4     1916   2154   1566    -80   -243     99       C
#HETATM   38  CAB URL A   4      36.671  18.101  41.303  1.00 16.94           C
#ANISOU   38  CAB URL A   4     2142   2542   1751   -301     74   -224       C
#HETATM   39  CAF URL A   4      37.711  16.639  39.536  1.00 15.51           C
#ANISOU   39  CAF URL A   4     2064   2069   1759    -24   -284    -19       C
#HETATM   40  CAJ URL A   4      38.918  17.552  39.310  1.00 14.25           C
#ANISOU   40  CAJ URL A   4     1909   2131   1373     52   -418     15       C
#HETATM   41  CAC URL A   4      40.178  16.651  39.081  1.00 14.24           C
#ANISOU   41  CAC URL A   4     2008   2074   1326     42   -290    -66       C
#HETATM   42  NAG URL A   4      38.747  18.393  38.108  1.00 14.18           N
#ANISOU   42  NAG URL A   4     2132   2118   1138    126   -524   -207       N
#HETATM   43  CAH URL A   4      39.028  19.730  38.095  1.00 14.04           C
#ANISOU   43  CAH URL A   4     1883   2079   1369    375   -339    -91       C
#HETATM   44  OAE URL A   4      39.372  20.338  39.117  1.00 13.66           O
#ANISOU   44  OAE URL A   4     1893   2083   1214    392   -213    -49       O
#HETATM   45  NAD URL A   4      38.906  20.358  36.905  1.00 15.60           N
#ANISOU   45  NAD URL A   4     2153   2243   1530    420   -169    123       N
#HETATM   46  CAG URY A   5      46.934  20.682  40.534  1.00 15.52           C
#ANISOU   46  CAG URY A   5     1767   2494   1635    -92    619     98       C
#HETATM   47  CAE URY A   5      47.749  21.636  41.140  1.00 16.21           C
#ANISOU   47  CAE URY A   5     1947   2526   1685   -121    810   -123       C
#HETATM   48  CAL URY A   5      47.800  22.931  40.631  1.00 17.60           C
#ANISOU   48  CAL URY A   5     2062   2497   2127   -327    189   -106       C
#HETATM   49  OAD URY A   5      48.597  23.869  41.226  1.00 19.25           O
#ANISOU   49  OAD URY A   5     2235   2703   2376   -485    178   -235       O
#HETATM   50  CAF URY A   5      47.030  23.274  39.518  1.00 17.19           C
#ANISOU   50  CAF URY A   5     2018   2261   2253    -44    301     22       C
#HETATM   51  CAH URY A   5      46.220  22.317  38.909  1.00 16.54           C
#ANISOU   51  CAH URY A   5     2036   2531   1718   -269    463    160       C
#HETATM   52  CAM URY A   5      46.164  21.022  39.424  1.00 14.49           C
#ANISOU   52  CAM URY A   5     1950   2230   1325     35    702   -251       C
#HETATM   53  CAI URY A   5      45.279  19.994  38.775  1.00 14.03           C
#ANISOU   53  CAI URY A   5     1903   2048   1378    102    350     73       C
#HETATM   54  CAN URY A   5      43.978  19.828  39.574  1.00 12.17           C
#ANISOU   54  CAN URY A   5     1889   1910    824     90    150    -84       C
#HETATM   55  CAA URY A   5      43.286  21.224  39.712  1.00 12.98           C
#ANISOU   55  CAA URY A   5     1836   1950   1142     78    167    106       C
#HETATM   56  NAJ URY A   5      43.049  18.961  38.841  1.00 13.61           N
#ANISOU   56  NAJ URY A   5     2169   2049    953   -126     83    -88       N
#HETATM   57  CAK URY A   5      42.160  18.136  39.448  1.00 12.80           C
#ANISOU   57  CAK URY A   5     1808   2014   1041    119     13    128       C
#HETATM   58  OAC URY A   5      42.139  17.948  40.672  1.00 14.26           O
#ANISOU   58  OAC URY A   5     2287   2126   1002   -171   -114   -103       O
#HETATM   59  NAB URY A   5      41.307  17.507  38.621  1.00 14.85           N
#ANISOU   59  NAB URY A   5     2203   2158   1280    -60    -81    -40       N
#HETATM   60  CAA URL A   6      37.504  23.679  43.984  1.00 17.56           C
#ANISOU   60  CAA URL A   6     2023   2676   1972    493    309    148       C
#HETATM   61  CAI URL A   6      38.802  23.048  43.478  1.00 14.69           C
#ANISOU   61  CAI URL A   6     1854   2135   1591    337    124     31       C
#HETATM   62  CAB URL A   6      39.982  23.711  44.171  1.00 14.73           C
#ANISOU   62  CAB URL A   6     2072   1985   1538    370     66   -105       C
#HETATM   63  CAF URL A   6      38.753  21.545  43.764  1.00 14.02           C
#ANISOU   63  CAF URL A   6     1691   2201   1434    171     86    180       C
#HETATM   64  CAJ URL A   6      40.051  20.807  43.393  1.00 11.94           C
#ANISOU   64  CAJ URL A   6     1501   2035    999     78   -134     76       C
#HETATM   65  CAC URL A   6      39.846  19.295  43.699  1.00 11.66           C
#ANISOU   65  CAC URL A   6     1506   2057    866   -245    -46      9       C
#HETATM   66  NAG URL A   6      40.395  20.926  41.966  1.00 11.99           N
#ANISOU   66  NAG URL A   6     1604   1922   1030     -5   -125     89       N
#HETATM   67  CAH URL A   6      41.675  21.107  41.568  1.00 11.23           C
#ANISOU   67  CAH URL A   6     1683   1710    873     50     16     -9       C
#HETATM   68  OAE URL A   6      42.594  21.301  42.376  1.00 12.05           O
#ANISOU   68  OAE URL A   6     1645   1821   1109    -86    -21    -90       O
#HETATM   69  NAD URL A   6      41.910  21.090  40.246  1.00 12.19           N
#ANISOU   69  NAD URL A   6     1798   1932    901    236    135    107       N
#HETATM   70  OAD URG A   7      44.617  13.076  45.437  1.00 20.38           O
#ANISOU   70  OAD URG A   7     3025   2930   1786    237    589    508       O
#HETATM   71  CAJ URG A   7      44.455  13.824  44.458  1.00 18.78           C
#ANISOU   71  CAJ URG A   7     2788   2320   2023    183    231    357       C
#HETATM   72  OAE URG A   7      44.466  13.459  43.268  1.00 21.90           O
#ANISOU   72  OAE URG A   7     3339   3150   1832    107    -37    567       O
#HETATM   73  CAF URG A   7      44.111  15.267  44.753  1.00 16.74           C
#ANISOU   73  CAF URG A   7     2364   2217   1777     98     40    312       C
#HETATM   74  CAG URG A   7      45.019  16.187  43.910  1.00 13.90           C
#ANISOU   74  CAG URG A   7     2089   1876   1314    320     93    -40       C
#HETATM   75  CAK URG A   7      44.545  17.649  44.020  1.00 12.13           C
#ANISOU   75  CAK URG A   7     1824   1763   1021     64    104    -80       C
#HETATM   76  CAA URG A   7      45.537  18.591  43.243  1.00 12.20           C
#ANISOU   76  CAA URG A   7     1877   1724   1033    104     96    -69       C
#HETATM   77  NAH URG A   7      43.218  17.800  43.418  1.00 12.77           N
#ANISOU   77  NAH URG A   7     1846   1995   1008    -32     73   -114       N
#HETATM   78  CAI URG A   7      42.181  18.423  44.015  1.00 11.72           C
#ANISOU   78  CAI URG A   7     1649   1840    962   -121    -33    -23       C
#HETATM   79  OAC URG A   7      42.256  18.849  45.175  1.00 11.74           O
#ANISOU   79  OAC URG A   7     1714   1797    946     -7    132    -57       O
#HETATM   80  NAB URG A   7      41.053  18.529  43.287  1.00 11.60           N
#ANISOU   80  NAB URG A   7     1720   1748    939   -149    -93    -75       N
#HETATM   81  NAB URK A   8      47.149  27.935  42.454  1.00 24.18           N
#ANISOU   81  NAB URK A   8     2545   2891   3750   -262    295    430       N
#HETATM   82  CAE URK A   8      46.954  26.486  42.610  1.00 20.35           C
#ANISOU   82  CAE URK A   8     2332   2783   2614    -78    603    204       C
#HETATM   83  CAF URK A   8      46.069  26.204  43.817  1.00 16.46           C
#ANISOU   83  CAF URK A   8     1934   2343   1973   -102    189   -231       C
#HETATM   84  CAG URK A   8      45.978  24.695  44.072  1.00 15.17           C
#ANISOU   84  CAG URK A   8     1935   2390   1437   -247    297    -44       C
#HETATM   85  CAH URK A   8      44.647  24.394  44.776  1.00 13.32           C
#ANISOU   85  CAH URK A   8     1849   2014   1195   -295    151   -179       C
#HETATM   86  CAK URK A   8      44.608  22.967  45.309  1.00 11.61           C
#ANISOU   86  CAK URK A   8     1510   2017    884    -68     79   -143       C
#HETATM   87  CAA URK A   8      43.286  22.792  46.155  1.00 12.07           C
#ANISOU   87  CAA URK A   8     1519   1904   1161    -43    156   -129       C
#HETATM   88  NAI URK A   8      44.539  21.977  44.235  1.00 11.62           N
#ANISOU   88  NAI URK A   8     1659   1767    986     62    -46    -80       N
#HETATM   89  CAJ URK A   8      45.255  20.833  44.244  1.00 10.85           C
#ANISOU   89  CAJ URK A   8     1454   1776    890      1    202    -17       C
#HETATM   90  OAD URK A   8      46.124  20.593  45.087  1.00 13.01           O
#ANISOU   90  OAD URK A   8     1686   2331    927    -57     73    -18       O
#HETATM   91  NAC URK A   8      44.978  19.970  43.268  1.00 11.45           N
#ANISOU   91  NAC URK A   8     1722   1795    833    124     74      1       N
#HETATM   92  CAA URL A   9      41.230  16.873  50.464  1.00 14.85           C
#ANISOU   92  CAA URL A   9     2014   2427   1201   -220    -32    -98       C
#HETATM   93  CAI URL A   9      41.984  18.074  49.897  1.00 13.54           C
#ANISOU   93  CAI URL A   9     1678   2369   1095     50     -2      2       C
#HETATM   94  CAB URL A   9      42.173  19.119  51.010  1.00 15.01           C
#ANISOU   94  CAB URL A   9     1870   2628   1205    154    -20   -232       C
#HETATM   95  CAF URL A   9      43.339  17.599  49.345  1.00 13.45           C
#ANISOU   95  CAF URL A   9     1737   2262   1109     47    112    135       C
#HETATM   96  CAJ URL A   9      44.205  18.763  48.875  1.00 12.83           C
#ANISOU   96  CAJ URL A   9     1566   2239   1070    -25      1    -24       C
#HETATM   97  CAC URL A   9      45.557  18.177  48.346  1.00 15.54           C
#ANISOU   97  CAC URL A   9     1840   2370   1693     39    331    -87       C
#HETATM   98  NAG URL A   9      43.550  19.496  47.784  1.00 11.71           N
#ANISOU   98  NAG URL A   9     1429   1927   1094     -7     23   -132       N
#HETATM   99  CAH URL A   9      43.687  20.825  47.628  1.00 10.31           C
#ANISOU   99  CAH URL A   9     1313   1913    692    131    132   -186       C
#HETATM  100  OAE URL A   9      44.326  21.515  48.430  1.00 11.96           O
#ANISOU  100  OAE URL A   9     1759   1820    963     -7     89   -289       O
#HETATM  101  NAD URL A   9      43.095  21.364  46.537  1.00 10.62           N
#ANISOU  101  NAD URL A   9     1414   1934    685    122    183   -133       N
#HETATM  102  CAA URA A  10      49.857  22.136  47.327  1.00 18.71           C
#ANISOU  102  CAA URA A  10     1499   3288   2322   -299   -107   -168       C
#HETATM  103  CAG URA A  10      48.528  22.168  48.061  1.00 16.14           C
#ANISOU  103  CAG URA A  10     1697   2849   1585   -300   -120   -140       C
#HETATM  104  CAB URA A  10      47.795  23.526  47.816  1.00 18.13           C
#ANISOU  104  CAB URA A  10     2062   2693   2131   -360   -298   -232       C
#HETATM  105  NAE URA A  10      47.661  21.102  47.545  1.00 14.89           N
#ANISOU  105  NAE URA A  10     1629   2590   1438   -102     56   -223       N
#HETATM  106  CAF URA A  10      47.129  20.127  48.312  1.00 13.98           C
#ANISOU  106  CAF URA A  10     1415   2543   1353     97     -8    -87       C
#HETATM  107  OAD URA A  10      47.352  20.032  49.528  1.00 15.41           O
#ANISOU  107  OAD URA A  10     1556   2940   1358     86    -62   -113       O
#HETATM  108  NAC URA A  10      46.340  19.253  47.669  1.00 14.02           N
#ANISOU  108  NAC URA A  10     1846   2229   1251     37    -26    -40       N
#HETATM  109  CAA ULC A  11      41.584  23.110  52.511  1.00 21.46           C
#ANISOU  109  CAA ULC A  11     2149   4208   1794    238    116   -895       C
#HETATM  110  CAM ULC A  11      42.896  23.614  51.907  1.00 21.47           C
#ANISOU  110  CAM ULC A  11     2229   4284   1645    244    176   -806       C
#HETATM  111  CAB ULC A  11      43.043  25.117  52.186  1.00 21.07           C
#ANISOU  111  CAB ULC A  11     2305   4171   1529     93   -172   -307       C
#HETATM  112  CAH ULC A  11      44.056  22.829  52.538  1.00 20.55           C
#ANISOU  112  CAH ULC A  11     2308   4107   1392    180    103   -779       C
#HETATM  113  CAN ULC A  11      45.411  23.355  52.054  1.00 20.73           C
#ANISOU  113  CAN ULC A  11     2226   4014   1636    279     93   -898       C
#HETATM  114  NAJ ULC A  11      45.492  23.190  50.604  1.00 19.06           N
#ANISOU  114  NAJ ULC A  11     2108   3568   1564     73   -396   -709       N
#HETATM  115  CAL ULC A  11      46.573  23.576  49.939  1.00 17.57           C
#ANISOU  115  CAL ULC A  11     2067   2997   1610    -19   -643   -486       C
#HETATM  116  OAF ULC A  11      47.521  24.116  50.521  1.00 21.22           O
#ANISOU  116  OAF ULC A  11     2400   3507   2154   -247   -903   -605       O
#HETATM  117  NAD ULC A  11      46.568  23.377  48.617  1.00 16.87           N
#ANISOU  117  NAD ULC A  11     1915   2899   1595   -239   -530   -383       N
#HETATM  118  CAG ULC A  11      46.528  22.554  52.724  1.00 22.12           C
#ANISOU  118  CAG ULC A  11     2524   4032   1846    197    -28   -561       C
#HETATM  119  NAI ULC A  11      46.550  21.198  52.123  1.00 20.98           N
#ANISOU  119  NAI ULC A  11     2332   3781   1856    267   -202   -248       N
#HETATM  120  CAK ULC A  11      46.034  20.126  52.730  1.00 19.97           C
#ANISOU  120  CAK ULC A  11     2110   3836   1642    195     75   -402       C
#HETATM  121  OAE ULC A  11      45.530  20.202  53.846  1.00 25.15           O
#ANISOU  121  OAE ULC A  11     2916   4543   2096   -205    864     69       O
#HETATM  122  NAC ULC A  11      46.085  18.976  52.084  1.00 20.44           N
#ANISOU  122  NAC ULC A  11     3054   3546   1167    200   -380     19       N
#HETATM  123  OAF ULN B   1      39.449  24.631  60.725  1.00 51.07           O
#ANISOU  123  OAF ULN B   1     9689   8169   1545  -5360   -303   1584       O
#HETATM  124  CAJ ULN B   1      39.007  24.169  61.752  1.00 26.36           C
#ANISOU  124  CAJ ULN B   1     4266   3941   1807  -3025     92      3       C
#HETATM  125  NAH ULN B   1      39.471  24.567  62.930  1.00 25.79           N
#ANISOU  125  NAH ULN B   1     3967   3214   2618  -2899   -712     -3       N
#HETATM  126  CAL ULN B   1      40.515  25.578  63.063  1.00 35.59           C
#ANISOU  126  CAL ULN B   1     3750   3017   6753  -2440   -944    618       C
#HETATM  127  CAC ULN B   1      40.817  25.788  64.546  1.00 41.02           C
#ANISOU  127  CAC ULN B   1     4537   4778   6268  -1750  -1307   -305       C
#HETATM  128  CAD ULN B   1      41.768  25.167  62.288  1.00 39.42           C
#ANISOU  128  CAD ULN B   1     4731   4979   5265  -2049   -674    552       C
#HETATM  129  NAI ULN B   1      38.048  23.247  61.743  1.00 37.31           N
#ANISOU  129  NAI ULN B   1     4905   4161   5110  -3602   -499    -89       N
#HETATM  130  CAM ULN B   1      37.473  22.704  60.500  1.00 34.26           C
#ANISOU  130  CAM ULN B   1     5267   3302   4447  -2192   -351    -73       C
#HETATM  131  CAE ULN B   1      35.917  22.752  60.504  1.00 39.98           C
#ANISOU  131  CAE ULN B   1     5501   4190   5498  -1295    135    144       C
#HETATM  132  CAG ULN B   1      37.983  21.254  60.380  1.00 29.25           C
#ANISOU  132  CAG ULN B   1     3490   3710   3914  -1819     84     88       C
#HETATM  133  CAK ULN B   1      39.467  21.067  60.744  1.00 22.89           C
#ANISOU  133  CAK ULN B   1     3349   3900   1447  -2166    411    -11       C
#HETATM  134  CAB ULN B   1      39.806  19.580  60.832  1.00 26.82           C
#ANISOU  134  CAB ULN B   1     3976   3753   2461  -1616    508    780       C
#HETATM  135  CAA ULN B   1      40.394  21.791  59.752  1.00 17.91           C
#ANISOU  135  CAA ULN B   1     2357   3304   1141  -1646    230    277       C
#HETATM  136  OAD URG B   2      31.575  29.211  59.076  1.00 37.67           O
#ANISOU  136  OAD URG B   2     7123   3659   3531   -292   1346  -1582       O
#HETATM  137  CAJ URG B   2      32.041  28.593  58.100  1.00 19.08           C
#ANISOU  137  CAJ URG B   2     2802   2309   2138  -1262      2  -1140       C
#HETATM  138  OAE URG B   2      31.426  27.815  57.400  1.00 27.93           O
#ANISOU  138  OAE URG B   2     4090   3331   3191  -1479   -851   -984       O
#HETATM  139  CAF URG B   2      33.496  28.788  57.797  1.00 24.93           C
#ANISOU  139  CAF URG B   2     3001   2937   3532   -975    443   -565       C
#HETATM  140  CAG URG B   2      34.286  28.489  59.090  1.00 26.30           C
#ANISOU  140  CAG URG B   2     3832   3069   3088   -275    359  -1082       C
#HETATM  141  CAK URG B   2      35.318  27.371  58.848  1.00 22.47           C
#ANISOU  141  CAK URG B   2     2937   3433   2167   -354    326   -623       C
#HETATM  142  CAA URG B   2      36.755  27.936  58.989  1.00 19.59           C
#ANISOU  142  CAA URG B   2     2698   3173   1572    -34    -14   -308       C
#HETATM  143  NAH URG B   2      35.186  26.314  59.865  1.00 28.93           N
#ANISOU  143  NAH URG B   2     4036   3765   3188   -229   1370   -149       N
#HETATM  144  CAI URG B   2      35.555  25.039  59.620  1.00 34.27           C
#ANISOU  144  CAI URG B   2     5302   3654   4065   -474   1376   -439       C
#HETATM  145  OAC URG B   2      35.957  24.691  58.509  1.00 44.59           O
#ANISOU  145  OAC URG B   2     7452   5361   4127   -462   1825   -698       O
#HETATM  146  NAB URG B   2      35.468  24.166  60.636  1.00 41.51           N
#ANISOU  146  NAB URG B   2     6332   4507   4932   -559   1054    445       N
#HETATM  147  NAB URK B   3      45.268  25.845  57.720  1.00 28.89           N
#ANISOU  147  NAB URK B   3     2751   4984   3241   -291    892   -115       N
#HETATM  148  CAE URK B   3      43.916  26.171  57.236  1.00 23.84           C
#ANISOU  148  CAE URK B   3     2889   3403   2765     69    895   -727       C
#HETATM  149  CAF URK B   3      42.986  24.973  57.406  1.00 24.20           C
#ANISOU  149  CAF URK B   3     2723   3361   3109     46    113   -597       C
#HETATM  150  CAG URK B   3      41.564  25.367  57.013  1.00 21.15           C
#ANISOU  150  CAG URK B   3     2716   3101   2216    144    428   -309       C
#HETATM  151  CAH URK B   3      40.743  24.091  56.753  1.00 19.86           C
#ANISOU  151  CAH URK B   3     2339   3119   2086    277   -259     31       C
#HETATM  152  CAK URK B   3      39.252  24.428  56.606  1.00 16.33           C
#ANISOU  152  CAK URK B   3     2294   2409   1501    410    104    207       C
#HETATM  153  CAA URK B   3      38.422  23.114  56.388  1.00 17.25           C
#ANISOU  153  CAA URK B   3     2726   2021   1805    676      3   -188       C
#HETATM  154  NAI URK B   3      38.790  25.107  57.827  1.00 16.84           N
#ANISOU  154  NAI URK B   3     2420   2536   1441    162    -75     19       N
#HETATM  155  CAJ URK B   3      38.058  26.235  57.787  1.00 14.32           C
#ANISOU  155  CAJ URK B   3     1683   2477   1279   -126   -174   -196       C
#HETATM  156  OAD URK B   3      37.733  26.758  56.724  1.00 16.89           O
#ANISOU  156  OAD URK B   3     2361   2962   1092   -116    164     56       O
#HETATM  157  NAC URK B   3      37.680  26.771  58.959  1.00 16.18           N
#ANISOU  157  NAC URK B   3     2307   2775   1064   -407   -430   -366       N
#HETATM  158  CAA URL B   4      31.805  22.386  52.948  1.00 17.06           C
#ANISOU  158  CAA URL B   4     2413   2056   2013    -83    160    263       C
#HETATM  159  CAI URL B   4      33.234  22.895  53.161  1.00 16.36           C
#ANISOU  159  CAI URL B   4     2322   2158   1735     24     81    293       C
#HETATM  160  CAB URL B   4      34.055  22.606  51.901  1.00 15.39           C
#ANISOU  160  CAB URL B   4     2145   1884   1816    -73    110    327       C
#HETATM  161  CAF URL B   4      33.183  24.401  53.448  1.00 14.97           C
#ANISOU  161  CAF URL B   4     2007   2189   1490    -65    387    263       C
#HETATM  162  CAJ URL B   4      34.569  24.986  53.754  1.00 13.14           C
#ANISOU  162  CAJ URL B   4     1854   1966   1171    159    287    377       C
#HETATM  163  CAC URL B   4      34.392  26.503  54.105  1.00 13.31           C
#ANISOU  163  CAC URL B   4     1760   2091   1207    173    124    137       C
#HETATM  164  NAG URL B   4      35.213  24.352  54.926  1.00 13.94           N
#ANISOU  164  NAG URL B   4     2086   2131   1079    107    147    274       N
#HETATM  165  CAH URL B   4      36.524  23.944  54.945  1.00 14.07           C
#ANISOU  165  CAH URL B   4     2321   1804   1219    328     71    102       C
#HETATM  166  OAE URL B   4      37.248  23.975  53.934  1.00 14.27           O
#ANISOU  166  OAE URL B   4     2302   1725   1395    465    167   -124       O
#HETATM  167  NAD URL B   4      36.991  23.480  56.140  1.00 16.30           N
#ANISOU  167  NAD URL B   4     2705   1979   1507    429   -170    266       N
#HETATM  168  CAG URY B   5      41.253  30.334  52.528  1.00 16.17           C
#ANISOU  168  CAG URY B   5     2499   1972   1672   -356   -286   -139       C
#HETATM  169  CAE URY B   5      42.507  30.540  51.954  1.00 17.61           C
#ANISOU  169  CAE URY B   5     2573   2413   1705   -378   -261    -24       C
#HETATM  170  CAL URY B   5      43.635  29.941  52.502  1.00 17.67           C
#ANISOU  170  CAL URY B   5     2551   2382   1780   -252    -35     80       C
#HETATM  171  OAD URY B   5      44.858  30.150  51.946  1.00 21.71           O
#ANISOU  171  OAD URY B   5     3072   2982   2194   -545    396    425       O
#HETATM  172  CAF URY B   5      43.516  29.140  53.632  1.00 18.43           C
#ANISOU  172  CAF URY B   5     2700   2287   2016   -405   -178    206       C
#HETATM  173  CAH URY B   5      42.269  28.936  54.209  1.00 18.11           C
#ANISOU  173  CAH URY B   5     2697   2223   1961   -432   -170    172       C
#HETATM  174  CAM URY B   5      41.133  29.518  53.647  1.00 16.25           C
#ANISOU  174  CAM URY B   5     2588   2197   1387   -294    -45   -322       C
#HETATM  175  CAI URY B   5      39.789  29.283  54.271  1.00 14.82           C
#ANISOU  175  CAI URY B   5     2487   2119   1026    -75   -106   -436       C
#HETATM  176  CAN URY B   5      39.022  28.192  53.522  1.00 14.26           C
#ANISOU  176  CAN URY B   5     2010   2098   1308    -48    -63   -438       C
#HETATM  177  CAA URY B   5      39.905  26.896  53.417  1.00 14.53           C
#ANISOU  177  CAA URY B   5     2229   1879   1413   -119   -376   -220       C
#HETATM  178  NAJ URY B   5      37.834  27.815  54.275  1.00 14.18           N
#ANISOU  178  NAJ URY B   5     1928   2370   1088    -88   -179   -331       N
#HETATM  179  CAK URY B   5      36.659  27.490  53.690  1.00 12.65           C
#ANISOU  179  CAK URY B   5     1838   2086    882    -59   -129   -111       C
#HETATM  180  OAC URY B   5      36.448  27.620  52.473  1.00 12.68           O
#ANISOU  180  OAC URY B   5     1956   2040    819     22    -56   -231       O
#HETATM  181  NAB URY B   5      35.713  27.044  54.535  1.00 13.24           N
#ANISOU  181  NAB URY B   5     1858   2212    958    145      9     71       N
#HETATM  182  CAA URL B   6      39.236  20.770  48.809  1.00 16.59           C
#ANISOU  182  CAA URL B   6     3188   1564   1551     -2     -6   -199       C
#HETATM  183  CAI URL B   6      39.300  22.134  49.503  1.00 12.68           C
#ANISOU  183  CAI URL B   6     2233   1526   1059     12   -120    -21       C
#HETATM  184  CAB URL B   6      40.453  22.947  48.907  1.00 12.57           C
#ANISOU  184  CAB URL B   6     2041   1730   1004    149    -83     48       C
#HETATM  185  CAF URL B   6      37.943  22.835  49.329  1.00 12.49           C
#ANISOU  185  CAF URL B   6     2200   1517   1026    -32    -79   -227       C
#HETATM  186  CAJ URL B   6      37.949  24.320  49.730  1.00 10.82           C
#ANISOU  186  CAJ URL B   6     1818   1468    826     63     23   -148       C
#HETATM  187  CAC URL B   6      36.527  24.888  49.442  1.00 12.20           C
#ANISOU  187  CAC URL B   6     1754   1688   1192   -104   -203      7       C
#HETATM  188  NAG URL B   6      38.234  24.519  51.153  1.00 10.75           N
#ANISOU  188  NAG URL B   6     1711   1564    809    -78     39    -53       N
#HETATM  189  CAH URL B   6      39.003  25.552  51.561  1.00 11.45           C
#ANISOU  189  CAH URL B   6     1717   1580   1053    -49    -93    -37       C
#HETATM  190  OAE URL B   6      39.579  26.284  50.756  1.00 12.18           O
#ANISOU  190  OAE URL B   6     1882   1567   1177    -42    -36      3       O
#HETATM  191  NAD URL B   6      39.120  25.744  52.878  1.00 13.64           N
#ANISOU  191  NAD URL B   6     2127   1908   1147   -108   -272   -275       N
#HETATM  192  OAD URG B   7      33.294  31.977  47.767  1.00 20.22           O
#ANISOU  192  OAD URG B   7     2838   2640   2205    562   -455    298       O
#HETATM  193  CAJ URG B   7      34.050  31.717  48.721  1.00 17.74           C
#ANISOU  193  CAJ URG B   7     2766   2364   1611    293   -157    166       C
#HETATM  194  OAE URG B   7      34.031  32.283  49.833  1.00 22.23           O
#ANISOU  194  OAE URG B   7     3331   3333   1780    708     94   -230       O
#HETATM  195  CAF URG B   7      35.025  30.578  48.536  1.00 16.47           C
#ANISOU  195  CAF URG B   7     2534   2093   1630     94   -344    181       C
#HETATM  196  CAG URG B   7      36.313  30.918  49.287  1.00 14.90           C
#ANISOU  196  CAG URG B   7     2257   1954   1450    125    -51     68       C
#HETATM  197  CAK URG B   7      37.352  29.795  49.129  1.00 12.38           C
#ANISOU  197  CAK URG B   7     2024   1730    947   -101    124     22       C
#HETATM  198  CAA URG B   7      38.681  30.219  49.870  1.00 13.67           C
#ANISOU  198  CAA URG B   7     2029   1748   1416    -64     57   -225       C
#HETATM  199  NAH URG B   7      36.859  28.548  49.732  1.00 11.56           N
#ANISOU  199  NAH URG B   7     1775   1600   1016    -22      6     -1       N
#HETATM  200  CAI URG B   7      36.878  27.337  49.130  1.00 10.45           C
#ANISOU  200  CAI URG B   7     1604   1588    778    -57   -129    119       C
#HETATM  201  OAC URG B   7      37.235  27.178  47.953  1.00 11.54           O
#ANISOU  201  OAC URG B   7     1868   1714    800   -195      9    175       O
#HETATM  202  NAB URG B   7      36.470  26.305  49.887  1.00 11.61           N
#ANISOU  202  NAB URG B   7     1815   1655    941   -103    112    108       N
#HETATM  203  NAB URK B   8      47.888  27.332  49.726  1.00 29.17           N
#ANISOU  203  NAB URK B   8     2268   3913   4900     28     10   -203       N
#HETATM  204  CAE URK B   8      46.590  28.018  49.660  1.00 20.83           C
#ANISOU  204  CAE URK B   8     2640   2528   2744     45   -355   -239       C
#HETATM  205  CAF URK B   8      45.469  27.013  49.424  1.00 20.98           C
#ANISOU  205  CAF URK B   8     2228   2909   2833    -37    -81    -83       C
#HETATM  206  CAG URK B   8      44.203  27.723  48.927  1.00 15.92           C
#ANISOU  206  CAG URK B   8     2098   2031   1916   -364     44   -183       C
#HETATM  207  CAH URK B   8      43.330  26.701  48.201  1.00 13.91           C
#ANISOU  207  CAH URK B   8     1853   1962   1469   -186      2    -56       C
#HETATM  208  CAK URK B   8      42.029  27.321  47.715  1.00 12.60           C
#ANISOU  208  CAK URK B   8     1974   1819    992   -157     -9   -174       C
#HETATM  209  CAA URK B   8      41.220  26.232  46.906  1.00 12.45           C
#ANISOU  209  CAA URK B   8     1894   1804   1030   -199    111   -167       C
#HETATM  210  NAI URK B   8      41.155  27.719  48.825  1.00 12.72           N
#ANISOU  210  NAI URK B   8     2230   1584   1018   -148    126    -81       N
#HETATM  211  CAJ URK B   8      40.498  28.901  48.836  1.00 11.53           C
#ANISOU  211  CAJ URK B   8     2208   1426    746   -233     -1   -330       C
#HETATM  212  OAD URK B   8      40.705  29.794  48.001  1.00 12.89           O
#ANISOU  212  OAD URK B   8     2273   1407   1215   -212      5   -143       O
#HETATM  213  NAC URK B   8      39.611  29.064  49.815  1.00 11.78           N
#ANISOU  213  NAC URK B   8     2055   1576    842   -168     -9   -114       N
#HETATM  214  CAA URL B   9      35.048  27.291  42.656  1.00 14.26           C
#ANISOU  214  CAA URL B   9     1969   2052   1395   -134   -261   -157       C
#HETATM  215  CAI URL B   9      36.492  27.398  43.141  1.00 12.66           C
#ANISOU  215  CAI URL B   9     1853   1833   1122   -141    -79      0       C
#HETATM  216  CAB URL B   9      37.448  27.077  41.983  1.00 12.87           C
#ANISOU  216  CAB URL B   9     1753   1801   1334   -230      0   -210       C
#HETATM  217  CAF URL B   9      36.718  28.819  43.667  1.00 13.66           C
#ANISOU  217  CAF URL B   9     1928   1909   1354   -151   -205   -104       C
#HETATM  218  CAJ URL B   9      38.140  29.023  44.203  1.00 12.41           C
#ANISOU  218  CAJ URL B   9     1775   1769   1169    -77     -5   -111       C
#HETATM  219  CAC URL B   9      38.257  30.487  44.749  1.00 14.15           C
#ANISOU  219  CAC URL B   9     2055   1726   1594    -37     65    -73       C
#HETATM  220  NAG URL B   9      38.454  28.102  45.300  1.00 13.19           N
#ANISOU  220  NAG URL B   9     1993   1855   1161   -181     50    -33       N
#HETATM  221  CAH URL B   9      39.676  27.554  45.435  1.00 12.18           C
#ANISOU  221  CAH URL B   9     1993   1670    966   -244    142   -103       C
#HETATM  222  OAE URL B   9      40.562  27.730  44.594  1.00 12.71           O
#ANISOU  222  OAE URL B   9     1992   1893    941   -382     98     43       O
#HETATM  223  NAD URL B   9      39.876  26.788  46.529  1.00 11.83           N
#ANISOU  223  NAD URL B   9     1835   1715    943   -371     98   -107       N
#HETATM  224  CAA URA B  10      43.953  32.142  45.606  1.00 17.96           C
#ANISOU  224  CAA URA B  10     2450   2135   2236   -877    -42   -154       C
#HETATM  225  CAG URA B  10      43.206  31.035  44.889  1.00 14.83           C
#ANISOU  225  CAG URA B  10     2242   2275   1115   -668   -109    -22       C
#HETATM  226  CAB URA B  10      43.966  29.678  45.034  1.00 16.12           C
#ANISOU  226  CAB URA B  10     2081   2529   1511   -485    148    -89       C
#HETATM  227  NAE URA B  10      41.865  30.876  45.473  1.00 14.31           N
#ANISOU  227  NAE URA B  10     2266   2061   1109   -317    -14    -51       N
#HETATM  228  CAF URA B  10      40.731  30.854  44.732  1.00 14.27           C
#ANISOU  228  CAF URA B  10     2170   1904   1348   -581     -8    155       C
#HETATM  229  OAD URA B  10      40.741  31.003  43.499  1.00 15.67           O
#ANISOU  229  OAD URA B  10     2360   2175   1419   -715   -126    319       O
#HETATM  230  NAC URA B  10      39.584  30.662  45.413  1.00 14.32           N
#ANISOU  230  NAC URA B  10     2222   1935   1282   -430     67     69       N
#HETATM  231  CAA ULC B  11      40.321  24.586  40.352  1.00 20.03           C
#ANISOU  231  CAA ULC B  11     2231   2317   3059   -197    391    151       C
#HETATM  232  CAM ULC B  11      41.493  25.441  40.816  1.00 17.92           C
#ANISOU  232  CAM ULC B  11     2222   2380   2205   -139    193    366       C
#HETATM  233  CAB ULC B  11      42.794  24.851  40.259  1.00 19.54           C
#ANISOU  233  CAB ULC B  11     2147   2308   2968   -102     82    141       C
#HETATM  234  CAH ULC B  11      41.293  26.862  40.299  1.00 17.19           C
#ANISOU  234  CAH ULC B  11     2596   2362   1574    -55    298    223       C
#HETATM  235  CAN ULC B  11      42.409  27.790  40.779  1.00 16.86           C
#ANISOU  235  CAN ULC B  11     2385   2652   1367    -37    385    121       C
#HETATM  236  NAJ ULC B  11      42.355  27.930  42.250  1.00 16.32           N
#ANISOU  236  NAJ ULC B  11     2611   2147   1442    -68    546   -111       N
#HETATM  237  CAL ULC B  11      43.281  28.645  42.905  1.00 17.27           C
#ANISOU  237  CAL ULC B  11     2201   2840   1521   -114    548      3       C
#HETATM  238  OAF ULC B  11      44.216  29.185  42.302  1.00 20.04           O
#ANISOU  238  OAF ULC B  11     2722   2962   1927   -402    632    294       O
#HETATM  239  NAD ULC B  11      43.150  28.734  44.237  1.00 16.06           N
#ANISOU  239  NAD ULC B  11     2181   2419   1500   -601    312   -119       N
#HETATM  240  CAG ULC B  11      42.192  29.140  40.118  1.00 19.70           C
#ANISOU  240  CAG ULC B  11     2830   2683   1971    163    300    251       C
#HETATM  241  NAI ULC B  11      41.108  29.852  40.838  1.00 17.82           N
#ANISOU  241  NAI ULC B  11     2808   2535   1425   -196    236     91       N
#HETATM  242  CAK ULC B  11      39.895  30.098  40.317  1.00 23.67           C
#ANISOU  242  CAK ULC B  11     3041   3033   2917   -174   -301    -87       C
#HETATM  243  OAE ULC B  11      39.580  29.717  39.194  1.00 29.48           O
#ANISOU  243  OAE ULC B  11     3965   4265   2968    229   -511   -405       O
#HETATM  244  NAC ULC B  11      39.036  30.766  41.079  1.00 25.36           N
#ANISOU  244  NAC ULC B  11     3047   3405   3183   -161   -284   -215       N
#HETATM  245  O   HOH C   2      49.816  23.237  43.524  1.00 23.18           O
#HETATM  246  O   HOH C   3      44.938  31.605  49.695  1.00 23.90           O
#HETATM  247  O   HOH C   4      46.794  30.917  47.677  1.00 22.08           O
#HETATM  248  O   HOH C   5      48.067  32.346  45.304  1.00 29.75           O
#HETATM  249  O   HOH C   7      47.773  29.341  45.062  1.00 31.86           O
#HETATM  250  O   HOH C   8      42.237  31.925  48.708  1.00 18.06           O
#HETATM  251  O   HOH C  11      45.740  26.947  38.807  1.00 29.71           O
#HETATM  252  O   HOH C  12      44.510  26.717  32.341  1.00 20.69           O
#HETATM  253  O   HOH C  13      46.014  25.329  60.632  1.00 30.15           O
#HETATM  254  O   HOH C  14      46.209  23.991  55.943  1.00 33.90           O
#HETATM  255  O   HOH C  15      46.765  26.141  54.029  1.00 35.72           O
#HETATM  256  O   HOH C  17      49.343  29.168  51.475  1.00 40.76           O
#HETATM  257  O   HOH C  18      42.146  32.902  41.734  1.00 27.23           O
#HETATM  258  O   HOH C  19      49.748  19.464  50.885  1.00 29.98           O
#HETATM  259  O   HOH C  20      42.731  23.057  31.786  1.00 36.34           O
#HETATM  260  O   HOH C  34      49.115  28.605  40.811  1.00 41.25           O
#HETATM  261  O   HOH C  38      46.545  30.717  55.821  1.00 25.48           O
#HETATM  262  O   HOH C  40      48.191  26.893  46.736  1.00 34.80           O
#HETATM  263  O   HOH C  41      31.423  25.027  57.292  1.00 34.00           O
#HETATM  264  O   HOH C  42      28.831  25.742  56.080  1.00 30.28           O
#HETATM  265  O   HOH C  43      29.564  27.931  55.347  1.00 30.00           O
#HETATM  266  O   HOH C  44      45.178  21.627  56.244  1.00 33.86           O
#HETATM  267  OAA HED E   1      35.072  27.993  46.319  1.00 26.05           O
#ANISOU  267  OAA HED E   1     3614   4191   2093   -222   -398    306       O
#HETATM  268  CAC HED E   1      34.018  27.040  46.468  1.00 22.29           C
#ANISOU  268  CAC HED E   1     2995   3998   1476    112   -446    201       C
#HETATM  269  CAE HED E   1      34.536  25.649  46.092  1.00 20.80           C
#ANISOU  269  CAE HED E   1     2772   3988   1142    -58   -334    212       C
#HETATM  270  CAG HED E   1      33.703  24.568  46.780  1.00 21.39           C
#ANISOU  270  CAG HED E   1     2544   4112   1470     59   -249    488       C
#HETATM  271  CAH HED E   1      34.256  23.226  46.385  1.00 23.38           C
#ANISOU  271  CAH HED E   1     2677   3938   2268   -124    361    668       C
#HETATM  272  CAF HED E   1      33.216  22.168  46.646  1.00 27.21           C
#ANISOU  272  CAF HED E   1     3003   4038   3297   -501    145    -60       C
#HETATM  273  CAD HED E   1      33.608  21.440  47.934  1.00 31.08           C
#ANISOU  273  CAD HED E   1     3793   4914   3098   -260    171     27       C
#HETATM  274  CAA DIO D   1      37.373  26.331  37.715  1.00 28.28           C
#HETATM  275  OAE DIO D   1      38.396  27.309  38.008  1.00 28.52           O
#HETATM  276  CAC DIO D   1      38.860  27.862  36.833  1.00 28.86           C
#HETATM  277  CAD DIO D   1      39.560  26.765  36.110  1.00 28.80           C
#HETATM  278  OAF DIO D   1      38.550  25.856  35.671  1.00 28.85           O
#HETATM  279  CAB DIO D   1      37.899  25.299  36.791  1.00 28.27           C
